# Supplementary material
Source: publisher figshare collection journal article supplement (https://frontiersin.figshare.com/ndownloader/files/17483237)

# **Berberine protects C17.2 neural stem cells from oxidative damage followed by inducing neuronal differentiation**

Jia-Wen Shou <sup>1,2</sup>, Chun-Kai Cheung <sup>2</sup>, Jian Gao <sup>4</sup>, Wei-Wei Shi <sup>4</sup> and Pang-Chui Shaw <sup>1, 2, 3,\*</sup>

<sup>1</sup> School of Life Sciences, The Chinese University of Hong Kong, Shatin, Hong Kong, China

<sup>2</sup> Li Dak Sum Yip Yio Chin R & D Centre for Chinese Medicine, The Chinese University of Hong Kong, Shatin, Hong Kong, China

<sup>3</sup> State Key Laboratory of Research of Bioactivities and Clinical Applications of Medicinal Plants (CUHK) and Institute of Chinese Medicine, The Chinese University of Hong Kong, Shatin, Hong Kong, China

<sup>4</sup> Shenzhen Health Development Research Center, Shenzhen, China

\*Corresponding authors:

Wei-Wei Shi

Shenzhen Health Development Research Center, Shenzhen, China

Tel.: +86-755-83552132; Fax: +86-755-83552132.

Email address: shi1985@outlook.com

Pang-Chui Shaw

School of Life Sciences, The Chinese University of Hong Kong, Shatin, Hong Kong, China,

Tel.: +852 39431363; Fax: +852 26037246.

Email address: pcshaw@cuhk.edu.hk

### Supplementary Figure legends

**FIGURE 1S|** C17.2 cell viability after berberine (0.85, 1.69, 3.38, 6.75, 13.5, 27.0, 54.0  $\mu\text{M}$ ) treatment for 12 hours. The data represent the mean  $\pm$  SEM.

**FIGURE 2S|** C17.2 cell viability after berberine (0.85, 1.69, 3.38, 6.75, 13.5, 27.0, 54.0  $\mu\text{M}$ ) treatment for 24 hours. The data represent the mean  $\pm$  SEM. \* $P < 0.05$ , \*\* $P < 0.01$  and \*\*\* $P < 0.001$ .

Figure 1S

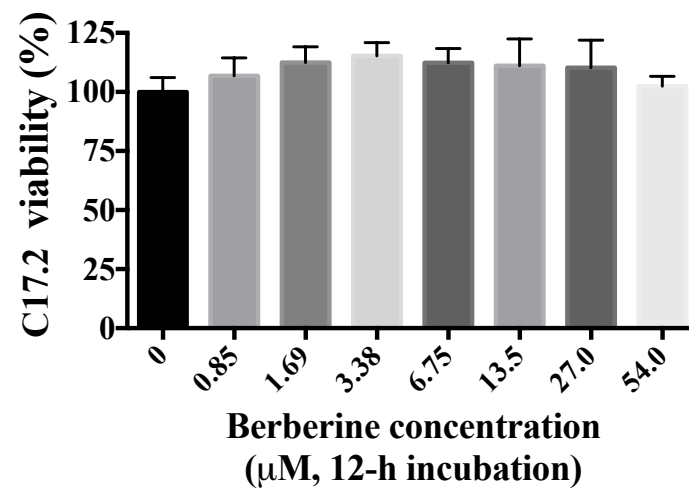

Figure 2S

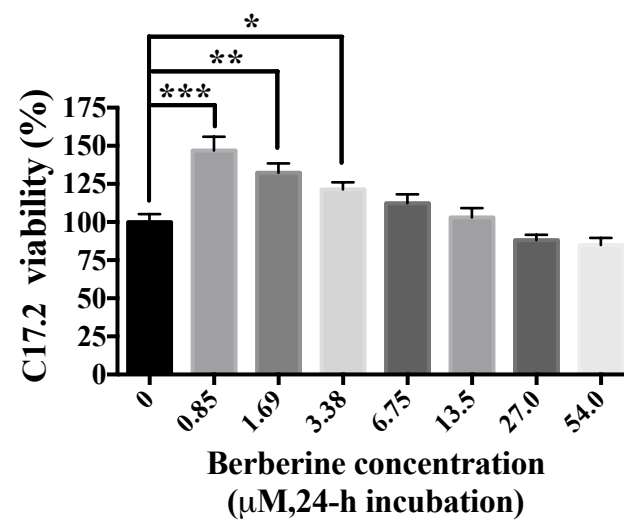

Supplement: Supplementary file [file 17483237]
